# Supplementary material
Source: PubMed Central journal article supplement (PMC4800427)
Supplement: cn5b00324_si_001.pdf [file cn5b00324_si_001.pdf]

## Single-molecule imaging of individual amyloid protein aggregates in human biofluids

**Authors:** Mathew H. Horrocks<sup>1†</sup>, Steven F. Lee<sup>1†</sup>, Sonia Gandhi<sup>2</sup>, Nadia K. Magdalinou<sup>3</sup>, Serene W. Chen<sup>1</sup>, Michael J. Devine<sup>4</sup>, Laura Tosatto<sup>1</sup>, Magnus Kjaergaard<sup>1,5</sup>, Joseph S. Beckwith<sup>1</sup>, Henrik Zetterberg<sup>2,6</sup>, Marija Iljina<sup>1</sup>, Nunilo Cremades<sup>1</sup>, Christopher M. Dobson<sup>1</sup>, Nicholas W. Wood<sup>2</sup>, David Klenerman<sup>1</sup>.

\*Affiliations:

<sup>1</sup>Department of Chemistry, University of Cambridge, Lensfield Road, Cambridge CB2 1EW, UK.

<sup>2</sup>Department of Molecular Neuroscience, University College London, Institute of Neurology, Queen Square, London WC1N 3BG, UK.

<sup>3</sup>Reta Lila Weston Institute of Neurological Studies, University College London, 1 Wakefield Street, London, WC1N 1PJ, UK.

<sup>4</sup>Division of Brain Sciences, Imperial College of London, Hammersmith Hospital, Du Cane Road, London W12 0NN, UK.

<sup>5</sup>Present address: iNANO, Aarhus University, Gustav Wieds Vej 14, DK-8000 Aarhus C, Denmark.

<sup>6</sup>Clinical Neurochemistry Laboratory, Department of Psychiatry and Neurochemistry, Institute of Neuroscience and Physiology, the Sahlgrenska Academy, University of Gothenburg, Mölndal, Sweden.

\*Correspondence to: dk10012@cam.ac.uk

†These authors contributed equally to this work.

## Supporting Information

### Data analysis

For the labeled  $\alpha$ S, each data-set consisted of 27 image stacks of 150 frames from both the blue and red channels, measured in different regions of the cover-slide. Data analysis was performed using ImageJ<sup>1</sup>; the stacks were first averaged over the 150 frames for each channel and the “Find Maxima” command (based on a plugin contributed by Michael Schmid) was used to detect spots present in the averaged blue channel, and the intensities of the detected spots were then quantified in both the blue and red channels. A standard noise tolerance level was set to differentiate the spots from the background (a change in signal of 1000 fluorescent counts was used as a threshold). For unlabeled samples, stacks only in the blue channel were recorded and analyzed.

In order to distinguish oligomers from fibrils when  $\alpha$ S was incubated under aggregating conditions and samples measured, a custom-code in Igor Pro (Wavemetrics) was written. Detected fluorescent spots were fitted to 2D elliptic Gaussians; only those that had fitted widths less than two pixels were classified as oligomers.

### The optimum ThT concentration for SAVE imaging

In order to determine the optimum ThT concentration to use for oligomer detection, the enriched oligomers were imaged at a range of ThT concentrations. Figure S1 shows the average number and intensity of the spots detected at different ThT concentrations. As the concentration of ThT increases, the number and intensity of spots detected increases, since more ThT is available to bind to the oligomers. However, at higher concentrations still ( $> 5 \mu\text{M}$ ), the detection efficiency decreases, since the background signal increases more than the signal from single oligomers, leading to a decrease in the signal-to-background ratio. For all experiments, a ThT concentration of  $5 \mu\text{M}$  was used.

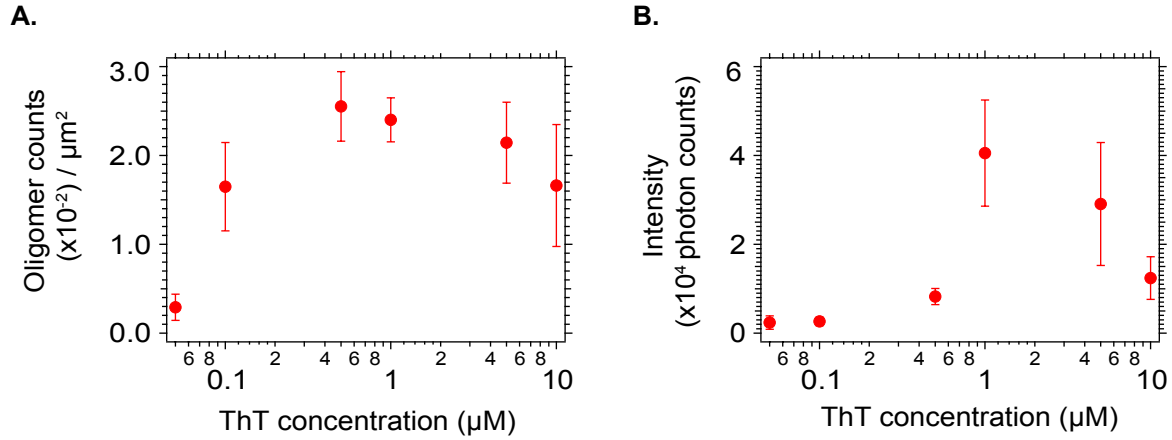

Figure S1. The average number of oligomers detected at varying concentrations of ThT (mean  $\pm$  S.D.,  $n = 9$  images). B. The average intensity of the oligomers detected at each concentration of ThT (mean  $\pm$  S.D.,  $n = 9$  images).

### The optimum threshold for spot counting

As mentioned previously, to count the number of species in the resultant images, we used the “Find maxima” command in ImageJ (with a standard noise tolerance level of 1000). This threshold was selected based on its ability to visibly select the majority of puncta in images of the enriched oligomers, without detecting background fluorescence as events. The thresholding was also insensitive to variation in the TIRF illumination across the images. This thresholding was then used for all of the CSF sample images. We attempted using higher thresholds to distinguish between the HCs and PD sample images further; however, with increasing thresholds, the number of events detected decreases exponentially, and the trend then becomes lost in the sampling noise, and so we found that simply using the find maxima command resulted in the least biased method for thresholding.

## Patient samples

Table S2. Clinical details of patients with PD, giving the number of aggregates and aggregate brightness (mean from three sets of 3x3 grids  $\pm$  S.D.). H-Y - Hoehn & Yahr grade.

| Case | Age | Gender | Duration (years) | H-Y Score | Number of aggregates (counts/ $\mu\text{m}^2$ ) |              | Aggregate brightness (photons) |            |
|------|-----|--------|------------------|-----------|-------------------------------------------------|--------------|--------------------------------|------------|
| 1    | 68  | Male   | 20               | 4         | 0.0144                                          | $\pm$ 0.0078 | 3537                           | $\pm$ 452  |
| 2    | 75  | Male   | 14               | 4         | 0.0148                                          | $\pm$ 0.0085 | 3295                           | $\pm$ 556  |
| 3    | 58  | Male   | 5.5              | 2         | 0.0129                                          | $\pm$ 0.0048 | 4692                           | $\pm$ 2086 |
| 4    | 69  | Female | 11               | 3         | 0.0100                                          | $\pm$ 0.0045 | 3260                           | $\pm$ 591  |
| 5    | 53  | Female | 5                | 1         | 0.0237                                          | $\pm$ 0.0047 | 5032                           | $\pm$ 437  |
| 6    | 60  | Male   | 6                | 2         | 0.0148                                          | $\pm$ 0.0061 | 3552                           | $\pm$ 355  |
| 7    | 62  | Female | 15               | 4         | 0.0160                                          | $\pm$ 0.0031 | 5711                           | $\pm$ 490  |
| 8    | 51  | Female | 5                | 1         | 0.0098                                          | $\pm$ 0.0017 | 2423                           | $\pm$ 1274 |
| 9    | 57  | Male   | 1.5              | 2         | 0.0112                                          | $\pm$ 0.0026 | 2980                           | $\pm$ 337  |
| 10   | 71  | Female | 15               | 2         | 0.0137                                          | $\pm$ 0.0021 | 3193                           | $\pm$ 283  |
| 11   | 74  | Female | 18               | 3         | 0.0055                                          | $\pm$ 0.0012 | 3101                           | $\pm$ 171  |
| 12   | 65  | Male   | 15               | 3         | 0.0177                                          | $\pm$ 0.0069 | 4165                           | $\pm$ 1083 |
| 13   | 63  | Female | 14               | 3         | 0.0189                                          | $\pm$ 0.0034 | 4879                           | $\pm$ 607  |
| 14   | 63  | Male   | 13               | 2         | 0.0088                                          | $\pm$ 0.0012 | 2644                           | $\pm$ 358  |
| 15   | 72  | Male   | 17               | 5         | 0.0134                                          | $\pm$ 0.0027 | 3493                           | $\pm$ 450  |
| 16   | 66  | Male   | 5                | 2         | 0.0085                                          | $\pm$ 0.0009 | 3154                           | $\pm$ 338  |
| 17   | 68  | Male   | 5                | 2         | 0.0027                                          | $\pm$ 0.0009 | 3802                           | $\pm$ 215  |
| 18   | 85  | Female | 14               | 4         | 0.0169                                          | $\pm$ 0.0012 | 3714                           | $\pm$ 504  |

Table S3. Clinical details of control subjects, giving the number of aggregates and aggregate brightness (mean from three sets of 3x3 grids  $\pm$  S.D.).

| Case | Age | Gender | Total aggregates (counts/ $\mu\text{m}^2$ ) |                | Average aggregate brightness (photons) |            |
|------|-----|--------|---------------------------------------------|----------------|----------------------------------------|------------|
| 19   | 69  | Male   | 0.0016                                      | $\pm$ 0.0078   | 2793                                   | $\pm$ 260  |
| 20   | 69  | Male   | 0.0022                                      | $\pm$ 0.008469 | 3254                                   | $\pm$ 835  |
| 21   | 67  | Female | 0.0049                                      | $\pm$ 0.0048   | 5863                                   | $\pm$ 1139 |
| 22   | 64  | Female | 0.0069                                      | $\pm$ 0.0045   | 2874                                   | $\pm$ 357  |
| 23   | 64  | Male   | 0.0055                                      | $\pm$ 0.0047   | 2377                                   | $\pm$ 443  |
| 24   | 63  | Male   | 0.0045                                      | $\pm$ 0.0061   | 3149                                   | $\pm$ 229  |
| 25   | 61  | Female | 0.0174                                      | $\pm$ 0.0031   | 4598                                   | $\pm$ 722  |
| 26   | 76  | Male   | 0.0058                                      | $\pm$ 0.0017   | 2502                                   | $\pm$ 112  |
| 27   | 62  | Male   | 0.0038                                      | $\pm$ 0.0026   | 2413                                   | $\pm$ 217  |
| 28   | 71  | Male   | 0.0028                                      | $\pm$ 0.0021   | 3447                                   | $\pm$ 555  |
| 29   | 71  | Male   | 0.0124                                      | $\pm$ 0.0012   | 3358                                   | $\pm$ 375  |
| 30   | 64  | Female | 0.0046                                      | $\pm$ 0.0069   | 2937                                   | $\pm$ 747  |
| 31   | 46  | Female | 0.0064                                      | $\pm$ 0.0034   | 3914                                   | $\pm$ 1234 |
| 32   | 56  | Male   | 0.0044                                      | $\pm$ 0.0012   | 2867                                   | $\pm$ 335  |
| 33   | 64  | Female | 0.0072                                      | $\pm$ 0.0027   | 6470                                   | $\pm$ 150  |
| 34   | 46  | Female | 0.0026                                      | $\pm$ 0.0009   | 3484                                   | $\pm$ 76   |
| 35   | 45  | Female | 0.0026                                      | $\pm$ 0.0009   | 3376                                   | $\pm$ 625  |
| 36   | 61  | Female | 0.0043                                      | $\pm$ 0.0012   | 3406                                   | $\pm$ 134  |

**Supplementary Materials References:**

1. Rasband, W.S., ImageJ, U. S. National Institutes of Health, Bethesda, Maryland, USA, <http://imagej.nih.gov/ij/>, 1997-2014.
